# Supplementary material for: Application of a super-stretched self-healing elastomer based on methyl vinyl silicone rubber for wearable electronic sensors
Source: Royal Society of Chemistry journal article supplement (doi:10.1039/d1py01089a), 2021-01-01
Supplement: d1py01089a1.pdf [file d1py01089a1.pdf]

## Supporting Information

### Application of super-stretched self-healing elastomer based on methyl vinyl silicone rubber for wearable electronic sensors

Tianwen Yu,<sup>a</sup> Yifei Shan,<sup>a</sup> Zhixi Li,<sup>a</sup> Xiaoxiao Wang,<sup>a</sup> Huanan Cui,<sup>c</sup> Kun Yang,<sup>\*b</sup> Yongyan Cui,<sup>\*a</sup>

<sup>a</sup>.College of Chemical Engineering and Materials Science, Tianjin University of Science and Technology, Tianjin 300457, PR China

<sup>b</sup>.Institute of Molecular Aggregation Science, Tianjin University, Tianjin 300072, PR China

<sup>c</sup>.China Academy of Space Technology, Beijing 100094, PR China

\* Co-corresponding-authors: yangkun1463@126.com (K. Yang), cyy@tust.edu.cn (Y. Cui).

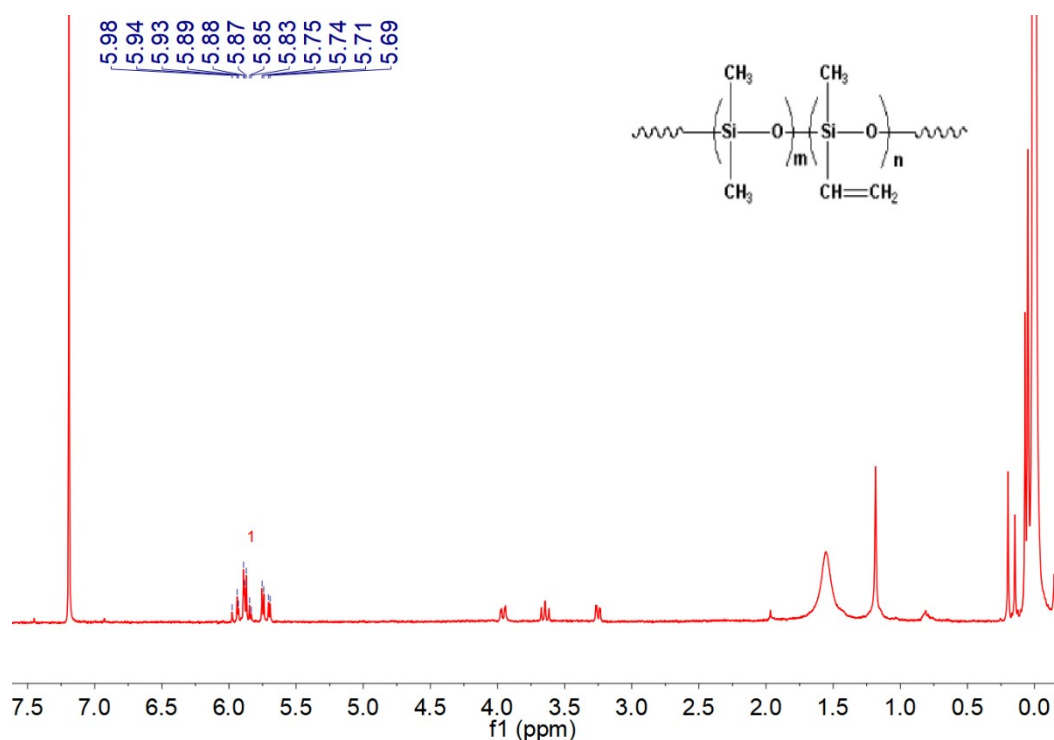

Figure S1 <sup>1</sup>H NMR spectrum of MVSR elastomer.

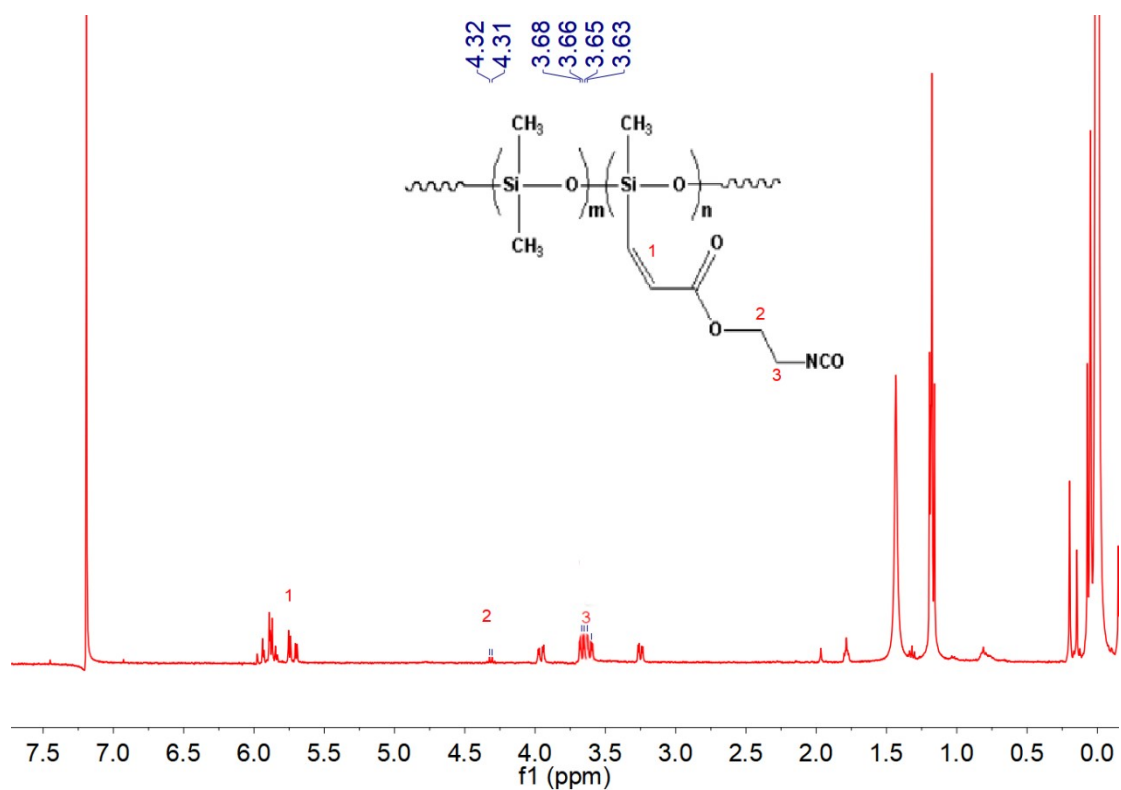

Figure S2 <sup>1</sup>H NMR spectrum of MVSR-ICA elastomer.

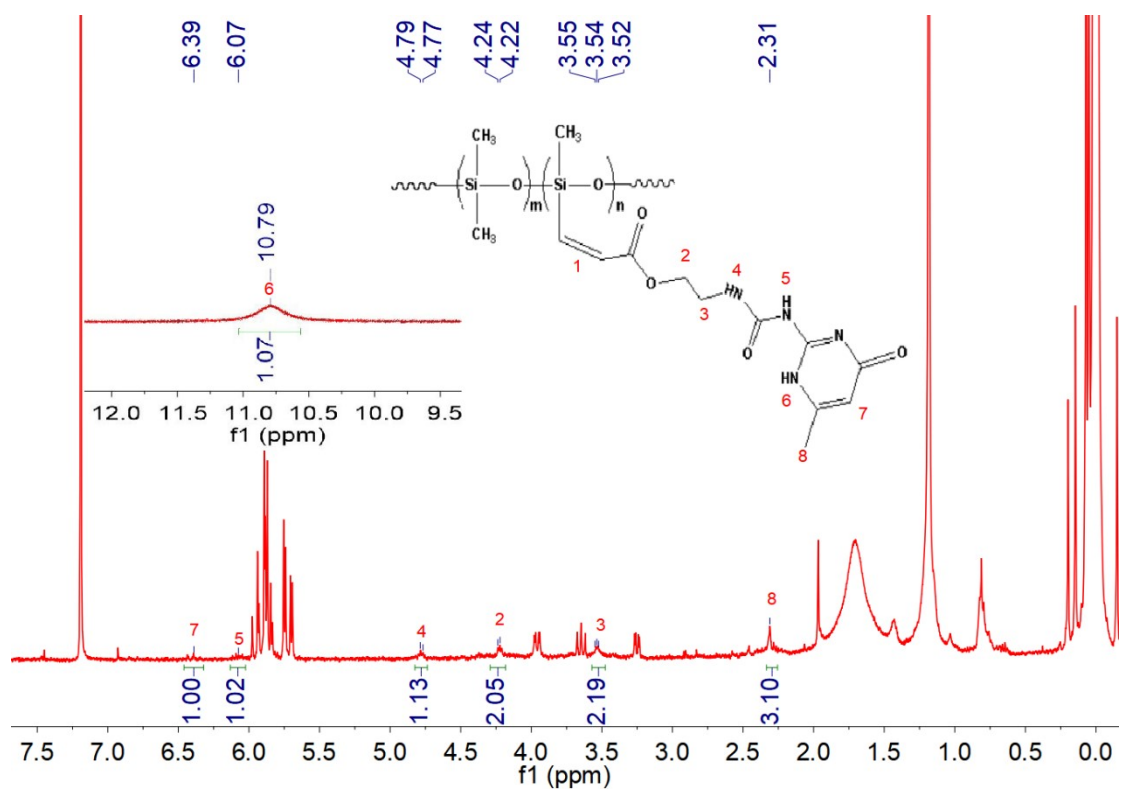

Figure S3 <sup>1</sup>H NMR spectrum of MVSR-UPY elastomer.

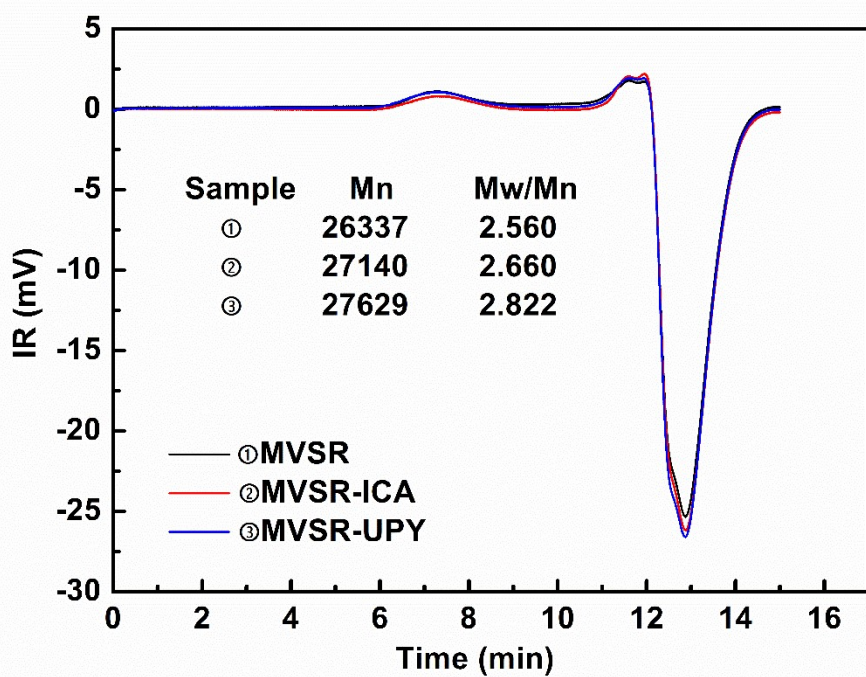

Figure S4 GPC curves of MVSR, MVSR-ICA and MVSR-UPY.

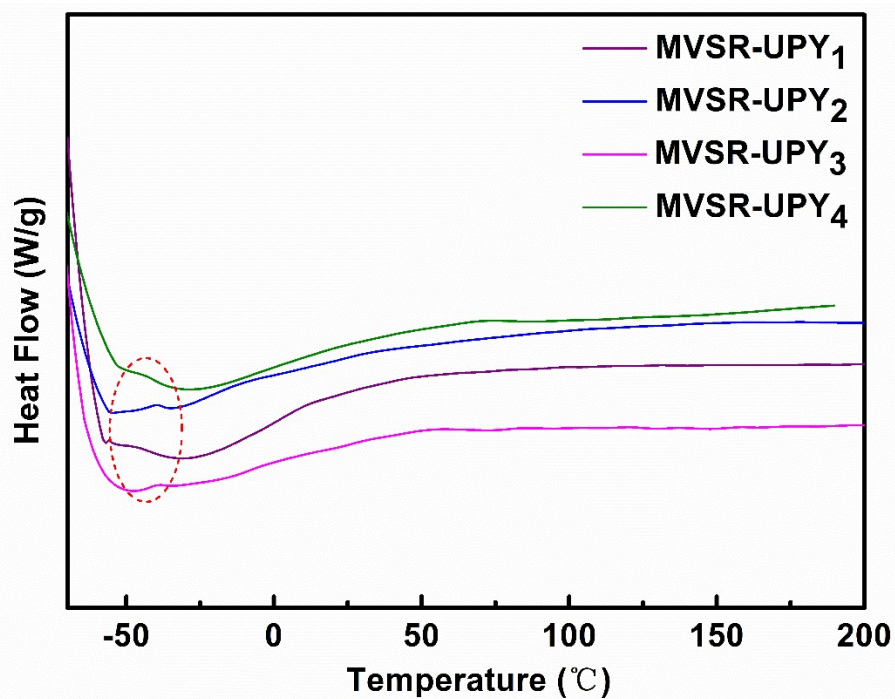

Figure S5 DSC curve of MVSR-UPY with different molar ratios.

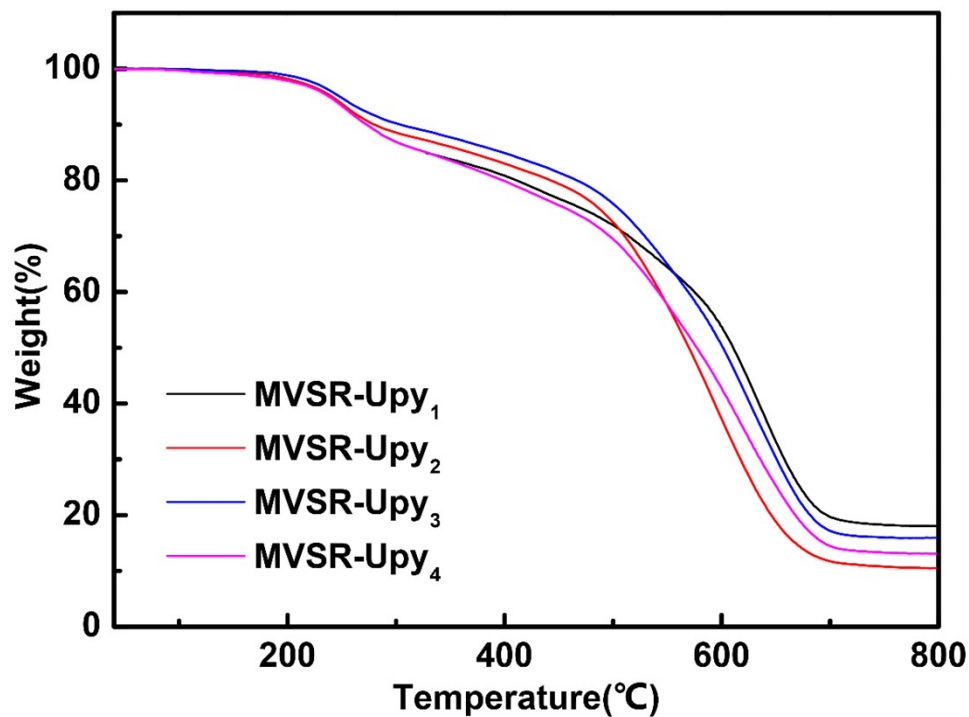

Figure S6 TGA curves of MVSR-UPY with different molar ratios.

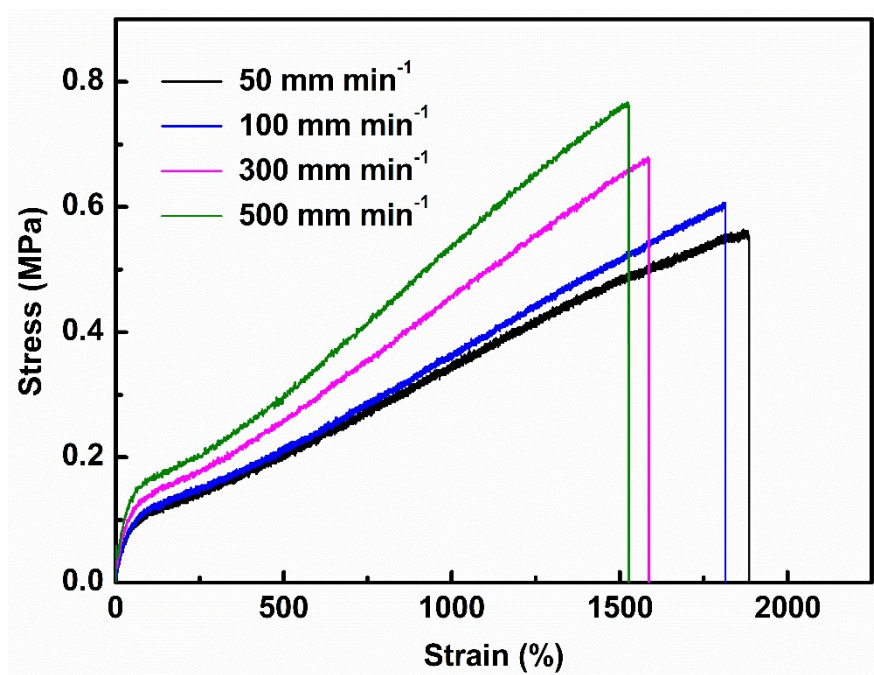

Figure S7 Stress-strain curves of MVSR-UPY<sub>3</sub> at different tensile rates.

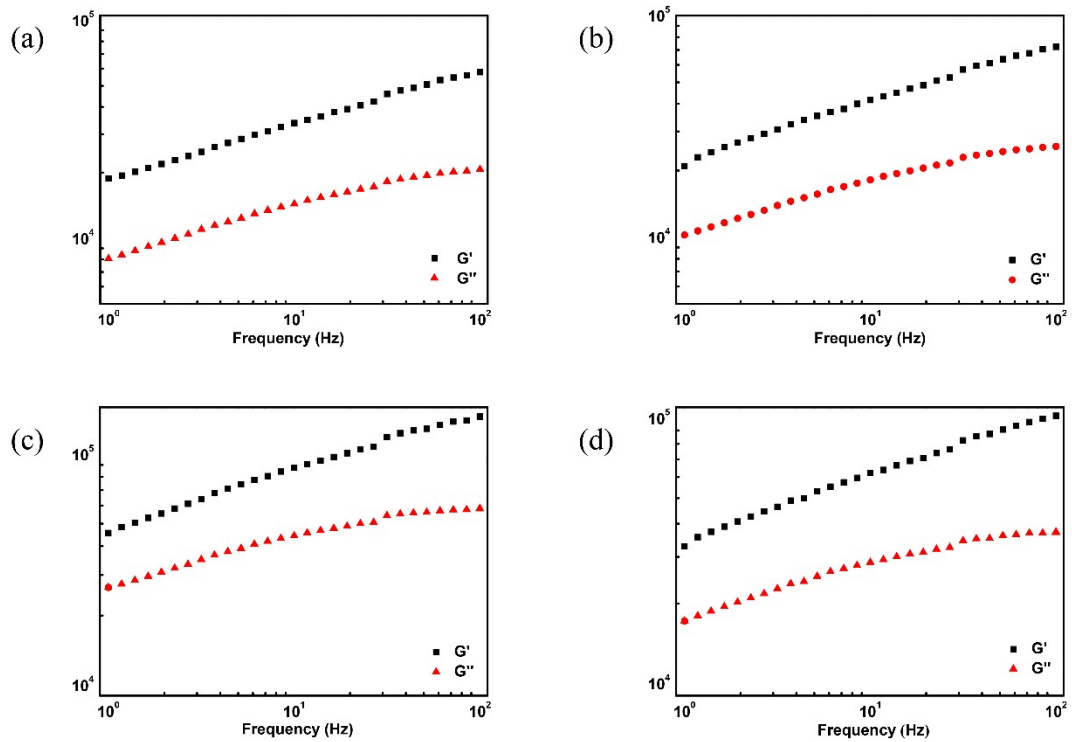

**Figure S8** Frequency sweeping of storage ( $G'$ ) and loss ( $G''$ ) moduli of the elastomer (a) MVSR-UPY<sub>1</sub> (b) MVSR-UPY<sub>2</sub> (c) MVSR-UPY<sub>3</sub> (d) MVSR-UPY<sub>4</sub>.

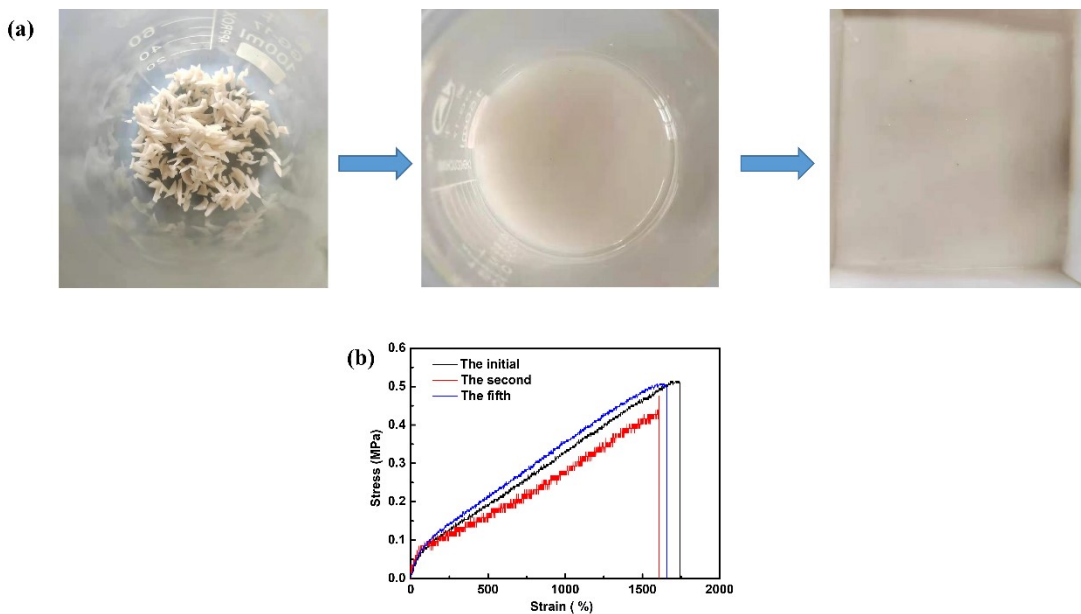

**Figure S9.** Recovery and reprocessing performance of MVSR-UPY elastomers. (a) The reprocessing of elastomers, (b) Stress-strain curves of MVSR-UPY elastomers with different processing times at a tensile rate of  $100 \text{ mm min}^{-1}$ .

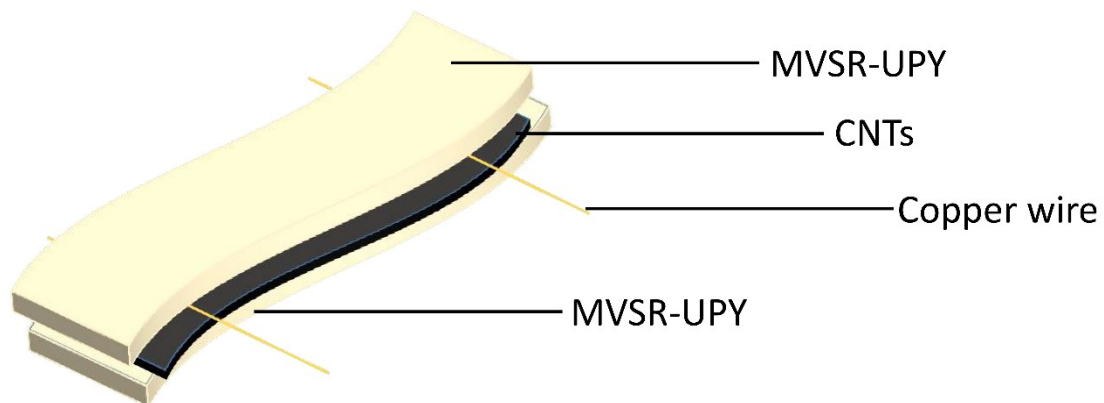

**Figure S10** Schematic diagram of sensor structure

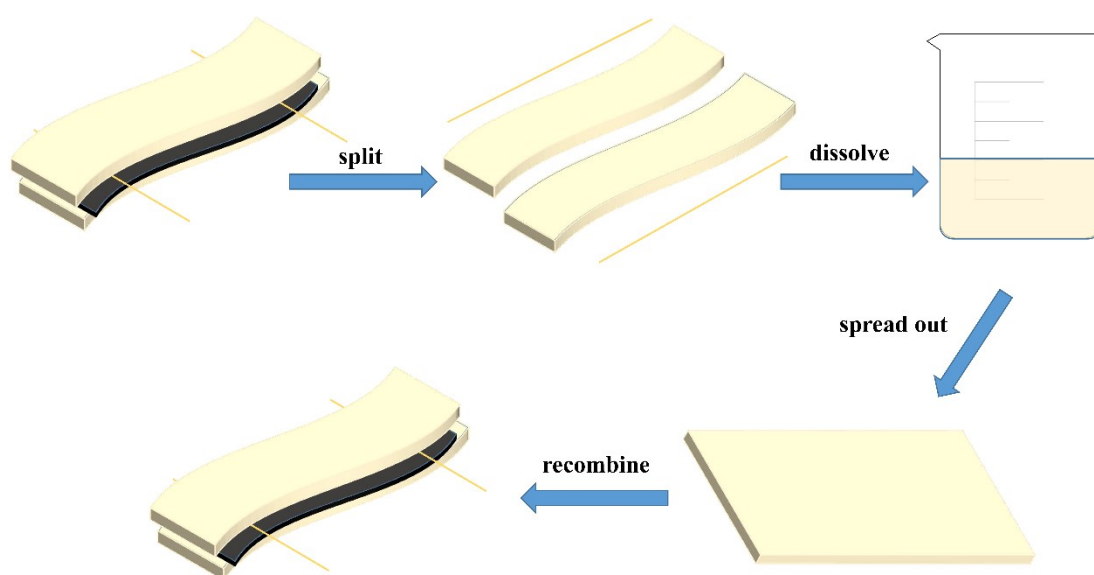

**Figure S11** Schematic diagram of sensor recovery and reorganization.
